# Supplementary material for: Individual variation of arthropod content in the diet of Hyacinth Visorbearer (Augastes scutatus), a restricted-range Neotropical hummingbird
Source: Research Square preprint supplement (doi:10.21203/rs.3.rs-7427996/v1), 2026-01-05
Supplement: Supplementary file 1 [file 6e514578d2b55e0901319052.docx]

**Supplementary Material**

**Individual variation of arthropod content in the diet of Hyacinth Visorbearer (*Augastes scutatus*), a restricted-range Neotropical hummingbird**

Paulo Ricardo Siqueira1, Pedro Giovâni da Silva1, Cássia Alves Lima-Rezende², Marcelo Ferreira de Vasconcelos³, Lemuel Olívio Leite4

1 Programa de Pós-Graduação em Ecologia, Conservação e Manejo da Vida Silvestre, Universidade Federal de Minas Gerais, CEP 31270-901, Belo Horizonte, Minas Gerais, Brazil

2 Programa de Pós-Graduação em Ciências Ambientais, Universidade Comunitária da Região de Chapecó, CEP 89809-900, Chapecó, Santa Catarina, Brazil

3 Museu de Ciências Naturais, Pontifícia Universidade Católica de Minas Gerais, Avenida Dom José Gaspar, 290, Coração Eucarístico, CEP 30535-901, Belo Horizonte, Minas Gerais, Brazil

4 Departamento de Biologia Geral, Laboratório de Zoologia, Universidade Estadual de Montes Claros, Prédio 2, Sala 95, Avenida Ruy Braga s/n, Vila Mauricéia, 39401-089, Montes Claros, Minas Gerais, Brazil

**Correspondence:**

Paulo Ricardo Siqueira. E-mail: [hylopezus.ornito@gmail.com](mailto:hylopezus.ornito@gmail.com)

**Table S1**: Food items, with their abundance, consumed by 25 specimens of Hyacinth Visorbearer (*Augastes scutatus*) collected in the 10 municipalities.

| **Specimen records number** | **Sampling municipalities** | **Latitude (S)** | **Longitude (W)** | **Collection date** | **Araneae** | **Blattodea** | **Coleoptera** | **Diptera** | **Formicidae** | **Hemiptera** | **Hymenoptera** | **Psocoptera** |
| --- | --- | --- | --- | --- | --- | --- | --- | --- | --- | --- | --- | --- |
| DZUFMG 3345 | Botumirim | 16958083 | 42948015 | 01/03/2000 | 0 | 0 | 0 | 0 | 1 | 1 | 6 | 0 |
| DZUFMG 3346 | Botumirim | 16958083 | 42948015 | 01/03/2000 | 1 | 0 | 0 | 0 | 1 | 0 | 1 | 0 |
| DZUFMG 3347 | Botumirim | 16958083 | 42948015 | 01/03/2000 | 0 | 0 | 0 | 0 | 10 | 1 | 9 | 0 |
| DZUFMG 3348 | Botumirim | 16958083 | 42948015 | 01/03/2000 | 0 | 0 | 0 | 0 | 0 | 0 | 5 | 0 |
| DZUFMG 3738 | Botumirim | 16958083 | 42948015 | 22/03/2003 | 0 | 0 | 0 | 4 | 0 | 0 | 7 | 0 |
| DZUFMG 3334 | Catas Altas | 20071231 | 4342346 | 11/10/1999 | 0 | 0 | 0 | 0 | 0 | 0 | 11 | 0 |
| DZUFMG 3335 | Catas Altas | 20071231 | 4342346 | 10/10/1999 | 0 | 0 | 0 | 0 | 0 | 0 | 7 | 0 |
| DZUFMG 3337 | Catas Altas | 20071231 | 4342346 | 12/04/2000 | 0 | 0 | 0 | 4 | 4 | 0 | 1 | 0 |
| DZUFMG 3341 | Catas Altas | 20071231 | 4342346 | 12/04/2000 | 0 | 0 | 0 | 0 | 0 | 1 | 4 | 0 |
| DZUFMG 3344 | Catas Altas | 20071231 | 4342346 | 23/03/2000 | 0 | 0 | 0 | 0 | 0 | 0 | 10 | 0 |
| DZUFMG 6017 | Conceição do Rio Acima | 20110000 | 43665833 | 25/09/2008 | 0 | 0 | 0 | 4 | 0 | 0 | 2 | 1 |
| DZUFMG 6018 | Conceição do Rio Acima | 20110000 | 43665833 | 25/09/2008 | 0 | 0 | 0 | 0 | 1 | 1 | 4 | 1 |
| DZUFMG 4802 | Congonhas | 20470041 | 43866738 | 09/12/2005 | 0 | 0 | 0 | 0 | 0 | 0 | 13 | 0 |
| DZUFMG 4803 | Congonhas | 20470041 | 43866738 | 09/12/2005 | 0 | 0 | 0 | 4 | 0 | 0 | 2 | 0 |
| DZUFMG 4804 | Congonhas | 20470041 | 43866738 | 10/12/2005 | 0 | 1 | 0 | 3 | 0 | 0 | 5 | 0 |
| DZUFMG 3910 | Itacambira | 17006137 | 43317776 | 30/08/2003 | 0 | 0 | 0 | 1 | 1 | 0 | 13 | 0 |
| DZUFMG 3912 | Itacambira | 17006137 | 43317776 | 04/09/2003 | 0 | 0 | 0 | 1 | 2 | 1 | 5 | 0 |
| DZUFMG 2895 | Jaboticatubas | 19413894 | 43618245 | 20/08/2000 | 0 | 0 | 0 | 0 | 1 | 0 | 36 | 0 |
| DZUFMG 2857 | Santana do Riacho | 19168497 | 43614811 | 18/06/2000 | 2 | 0 | 0 | 0 | 0 | 1 | 21 | 3 |
| DZUFMG 3331 | Santana do Riacho | 19168497 | 43614811 | 06/07/1999 | 0 | 0 | 0 | 0 | 0 | 1 | 13 | 0 |
| DZUFMG 4344 | Santana do Riacho | 19168497 | 43614811 | 11/01/2005 | 0 | 0 | 1 | 1 | 0 | 0 | 6 | 0 |
| DZUFMG 5290 | Santo Antônio do Retiro | 15244632 | 42662695 | 06/12/2006 | 0 | 0 | 0 | 1 | 0 | 0 | 2 | 0 |
| DZUFMG 4174 | São Gonçalo do Rio Preto | 1809942 | 43334825 | 17/05/2004 | 0 | 0 | 0 | 8 | 0 | 0 | 4 | 0 |
| DZUFMG 3332 | Serro | 18467551 | 43443923 | 27/12/2000 | 0 | 0 | 0 | 0 | 2 | 0 | 24 | 0 |
| DZUFMG 4214 | Serro | 18467551 | 43443923 | 24/04/2004 | 0 | 0 | 0 | 3 | 0 | 0 | 7 | 0 |
